# Supplementary material for: Effects of interfacial layers on the photoelectrochemical properties of tantalum nitride photoanodes for solar water splitting
Source: Royal Society of Chemistry journal article supplement (doi:10.1039/c6ta04363a), 2016-01-01
Supplement: c6ta04363a1.pdf [file c6ta04363a1.pdf]

**Supplementary Information**

Effects of interfacial layers on the photoelectrochemical properties  
of tantalum nitride photoanodes for solar water splitting

*Chizhong Wang, Takashi Hisatomi, Tsutomu Minegishi, Mamiko Nakabayashi, Naoya*

*Shibata, Masao Katayama, and Kazunari Domen\**

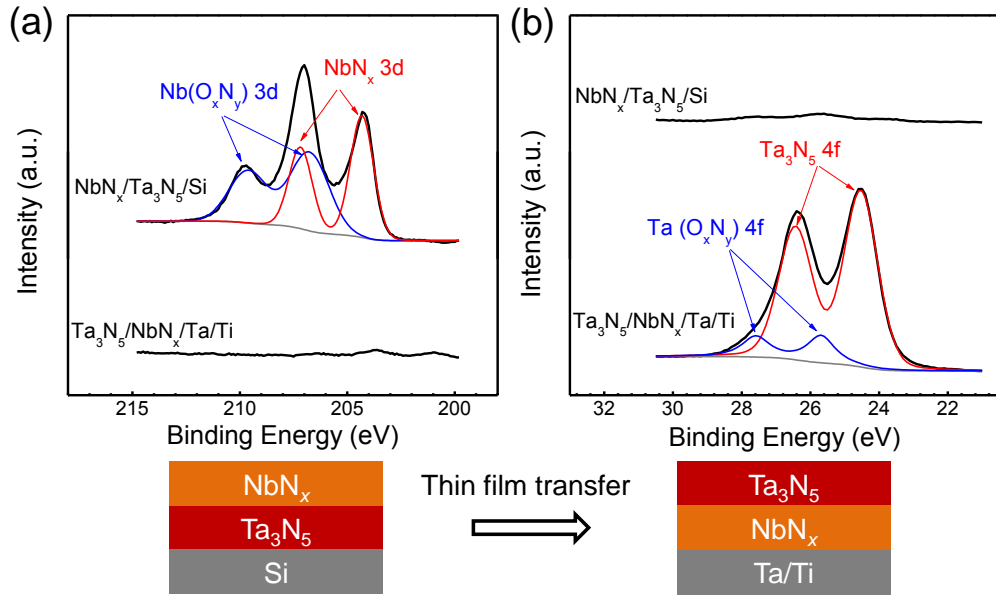

Fig. S1. (a) Nb 3d and (b) Ta 4f XPS spectra for  $\text{NbN}_x/\text{Ta}_3\text{N}_5/\text{Si}$  and transferred  $\text{Ta}_3\text{N}_5/\text{NbN}_x/\text{Ta/Ti}$  samples.

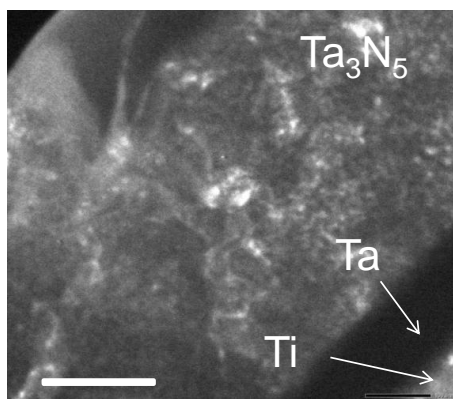

Fig. S2. Zone-axis TEM image of the cross-section of a Ta<sub>3</sub>N<sub>5</sub>/Ta/Ti sample without a NbN<sub>x</sub> interlayer. The scale bar is 200 nm.

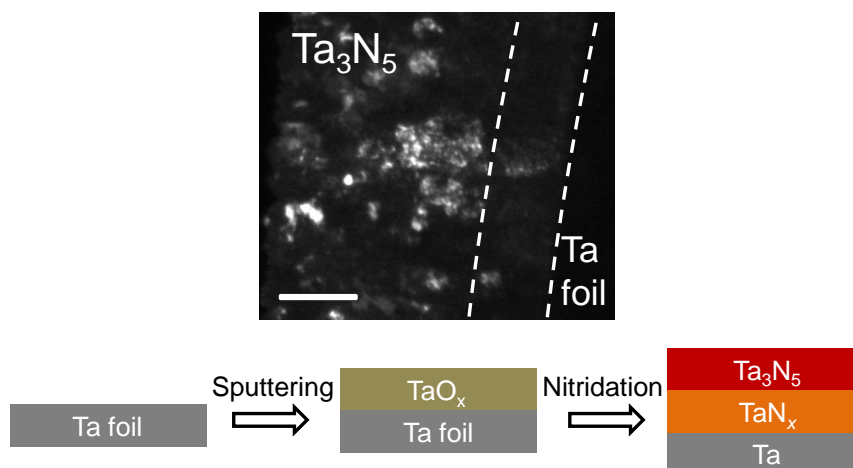

Fig. S3. Zone-axis TEM image of the cross-section of a Ta<sub>3</sub>N<sub>5</sub> film on a Ta foil substrate. The scale bar is 200 nm. To investigate the growth of the Ta<sub>3</sub>N<sub>5</sub> film on the metallic Ta foil substrate, an amorphous TaO<sub>x</sub> film was sputtered onto a highly-polished Ta foil substrate (1 × 1 cm<sup>2</sup> in size) at a working pressure of  $3.0 \times 10^{-2}$  Torr. Ar gas in a flow rate of 10 sccm was fed into the sputtering chamber along with the unintentional introduction of trace amount of molecular O<sub>2</sub>. The TaO<sub>x</sub>/Ta sample was subsequently nitrided in a flow of NH<sub>3</sub> gas (100 sccm) at 900 °C for 2 h with a temperature ramp rate of 20 °C min<sup>-1</sup>.

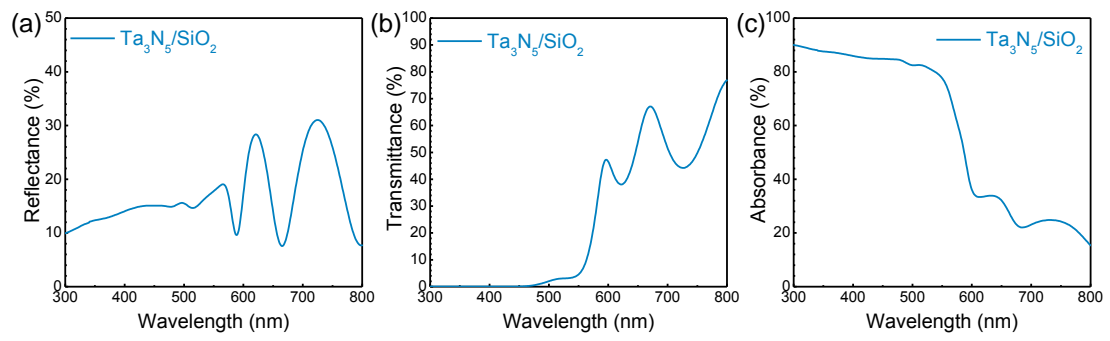

Fig. S4 (a) Light reflectance, (b) transmittance and (c) absorbance of a  $\text{Ta}_3\text{N}_5$  thin film (approximately 600 nm thick) on fused silica substrate.

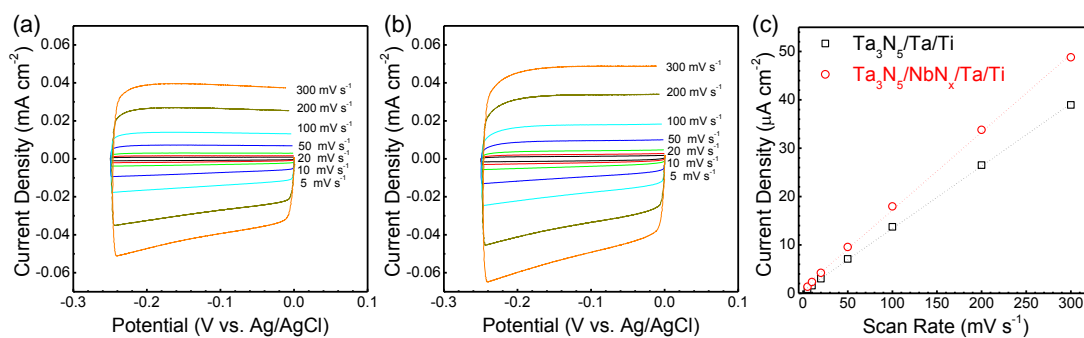

Fig. S5. Cyclic voltammograms for (a) Ta<sub>3</sub>N<sub>5</sub>/Ta/Ti, and (b) Ta<sub>3</sub>N<sub>5</sub>/NbN<sub>x</sub>/Ta/Ti as measured with scan rates varying from 5 to 300 mV s<sup>-1</sup>, and (c) the relationship between the capacitive current density in cyclic voltammograms (a) and (b) at -0.1 V vs. Ag/AgCl and the scan rate. The ratio for the ECSA of Ta<sub>3</sub>N<sub>5</sub>/Ta/Ti (*S*<sub>1</sub>) to Ta<sub>3</sub>N<sub>5</sub>/NbN<sub>x</sub>/Ta/Ti (*S*<sub>2</sub>) was estimated to be 0.8 on the basis of the slopes of the linear plots.

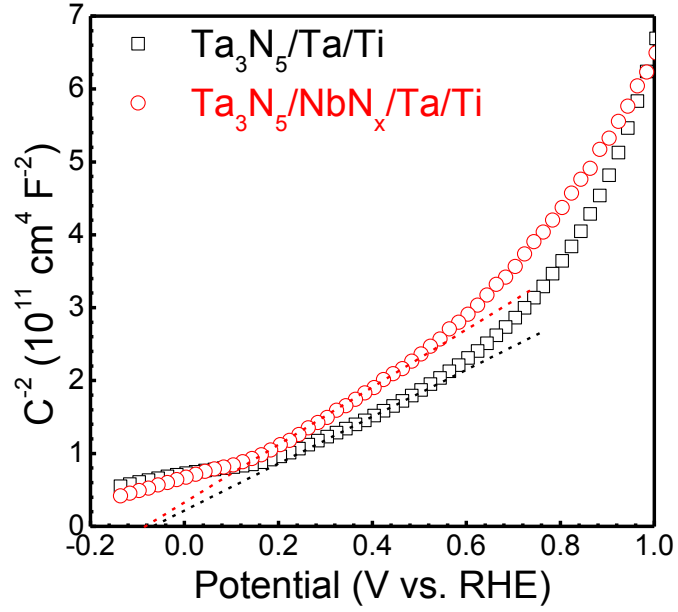

Fig. S6. Mott-Schottky (M-S) plots for the  $\text{Ta}_3\text{N}_5/\text{Ta}/\text{Ti}$  and  $\text{Ta}_3\text{N}_5/\text{NbN}_x/\text{Ta}/\text{Ti}$  photoelectrodes. The flat band potentials of the  $\text{Ta}_3\text{N}_5/\text{Ta}/\text{Ti}$  and  $\text{Ta}_3\text{N}_5/\text{NbN}_x/\text{Ta}/\text{Ti}$  photoelectrodes, derived from the intersection points with the potential axis, and were estimated to be  $-0.06$  and  $-0.08$  V vs. RHE, respectively. The carrier density can be estimated using the equation  $N_D = 2(\epsilon\epsilon_0erk_{\text{MS}})^{-1}$ , where  $k_{\text{MS}}$  is the slope of the fitted line from the M-S plot, and  $r$  is the roughness factor for  $\text{Ta}_3\text{N}_5$  photoelectrodes, obtained from the ECSA data in Fig. S5. The ratio for the carrier density of  $\text{Ta}_3\text{N}_5/\text{Ta}/\text{Ti}$  ( $N_{D1}$ ) to  $\text{Ta}_3\text{N}_5/\text{NbN}_x/\text{Ta}/\text{Ti}$  ( $N_{D2}$ ) was estimated to be 1.1.

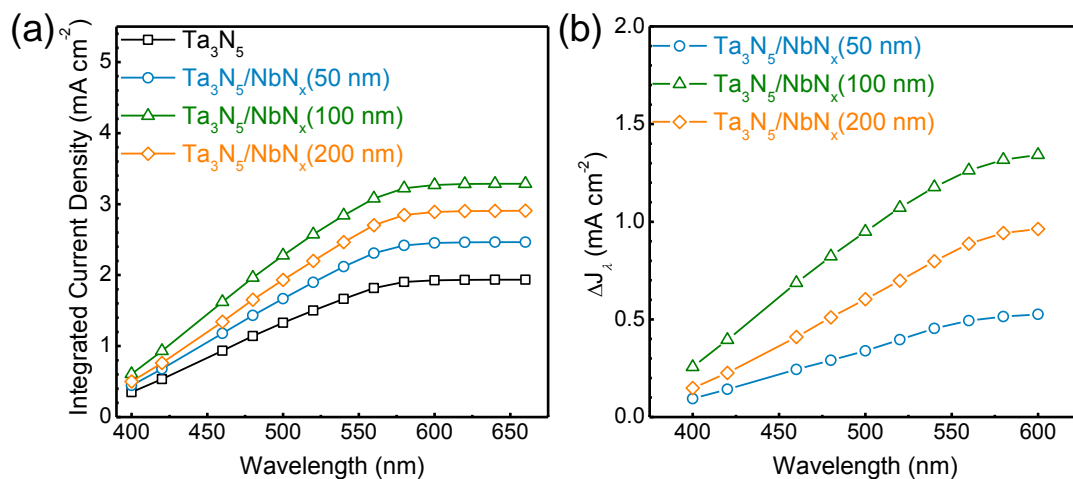

Fig. S7. (a) Integrated photocurrent densities ( $J_i$ ) at 1.23 V vs. RHE calculated on the basis of the standard AM 1.5G (ASTM G173-03) spectrum and the IPCE spectra shown in Fig. 7 in the main text. (b) Increment of the integrated photocurrent densities by the presence of the NbN<sub>x</sub> interlayers calculated from panel (a).



Table S1. Series resistances  $R_s$  and charge transfer resistances  $R_{CT}$  of the fitted Nyquist plots from Fig. 8 in the main text.

| NbN <sub>x</sub> thickness<br>(nm) | $R_s$ ( $\Omega$ ) | $R_{CT}$ ( $\Omega$ ) |
|------------------------------------|--------------------|-----------------------|
| 0                                  | 11                 | 7215                  |
| 50                                 | 12                 | 5098                  |
| 100                                | 12                 | 4416                  |
| 200                                | 19                 | 4860                  |
